# Supplementary material for: Dietary ω3 Fatty Acids and Phytosterols in the Modulation of the HDL Lipidome: A Longitudinal Crossover Clinical Study
Source: MDPI journal article supplement (doi:10.3390/nu15163637), 2023-08-18
Supplement: s1 [file s1]

## Supplementary Material: Tables and Figures

### Dietary $\omega$ 3 fatty acids and phytosterols in the modulation of the HDL lipidome: a longitudinal crossover clinical study.

Teresa Padro<sup>1,2,†\*</sup>, Anallely López-Yerena<sup>1,†</sup>, Antonio Perez<sup>3,4</sup>, Gemma Vilahur<sup>1,2</sup>,  
Lina Badimon<sup>1,2,5</sup>

- <sup>1</sup> Cardiovascular Program-ICCC, Institut d'Investigació Biomèdica Sant Pau (IIB SANT PAU), Barcelona, Spain
- <sup>2</sup> Centro de Investigación Biomédica en Red Cardiovascular (CIBER-CV), Instituto de Salud Carlos III, Madrid, Spain
- <sup>3</sup> Servicio de Endocrinología y Nutrición. Hospital de la Santa Creu i Sant Pau, IIB Sant Pau, Universitat Autònoma de Barcelona.
- <sup>4</sup> CIBER de Diabetes y Enfermedades Metabólicas Asociadas (CIBERDEM), Barcelona, Spain
- <sup>5</sup> Cardiovascular Research Chair, Universitat Autònoma de Barcelona (UAB), 08193 Barcelona, Spain

† These authors contributed equally to this study.

\* Corresponding Author

Address for corresponding author (\*):

#### **Dr Teresa Padro**

Cardiovascular Program-ICCC

Institut d'Investigació Biomèdica Sant Pau (IIB SANT PAU)

Sant Antoni M<sup>a</sup> Claret 167, 08025 Barcelona, Spain.

Phone: +34.935565886

E-mail: tpadro@santpau.cat

**Table S1.** Level of HDL- glycerophospholipids at baseline and after intervention with omega 3- or phytosterol-supplemented milk.

| Lipids       | $\omega$ 3 milk |             |        |              |              | PhyS milk   |             |        |         |       |
|--------------|-----------------|-------------|--------|--------------|--------------|-------------|-------------|--------|---------|-------|
|              | Before          | After       | Change | p-value      | FDR          | Before      | After       | Change | p-value | FDR   |
| PC 14:0/14:0 | 1.66 ± 0.41     | 0.97 ± 0.15 | -0.690 | 0.128        | 0.335        | 1.18 ± 0.21 | 1.33 ± 0.22 | 0.156  | 0.632   | 0.966 |
| PC 14:0/16:1 | 2.58 ± 0.47     | 1.86 ± 0.24 | -0.724 | 0.142        | 0.343        | 2.14 ± 0.35 | 2.23 ± 0.34 | 0.086  | 0.860   | 0.966 |
| PC 14:0/18:2 | 2.20 ± 0.19     | 2.00 ± 0.19 | -0.200 | 0.251        | 0.406        | 2.11 ± 0.14 | 2.15 ± 0.20 | 0.038  | 0.834   | 0.966 |
| PC 14:0/20:4 | 2.96 ± 0.29     | 2.57 ± 0.25 | -0.393 | 0.128        | 0.335        | 2.90 ± 0.21 | 2.89 ± 0.32 | -0.004 | 0.989   | 0.997 |
| PC 15:0/18:2 | 1.54 ± 0.13     | 1.35 ± 0.11 | -0.191 | <b>0.049</b> | 0.200        | 1.56 ± 0.13 | 1.50 ± 0.12 | -0.064 | 0.524   | 0.966 |
| PC 15:0/20:4 | 2.62 ± 0.23     | 2.41 ± 0.14 | -0.203 | 0.287        | 0.445        | 2.65 ± 0.18 | 2.60 ± 0.21 | -0.056 | 0.762   | 0.966 |
| PC 15:0/22:6 | 7.33 ± 0.88     | 8.90 ± 0.71 | 1.569  | <b>0.011</b> | 0.093        | 7.54 ± 0.79 | 7.29 ± 0.66 | -0.249 | 0.631   | 0.966 |
| PC 16:0/16:0 | 1.07 ± 0.05     | 1.05 ± 0.05 | -0.022 | 0.629        | 0.726        | 1.07 ± 0.07 | 1.06 ± 0.06 | -0.016 | 0.659   | 0.966 |
| PC 16:0/17:0 | 1.15 ± 0.13     | 0.98 ± 0.10 | -0.171 | <b>0.049</b> | 0.200        | 1.11 ± 0.19 | 1.01 ± 0.13 | -0.094 | 0.583   | 0.966 |
| PC 16:0/18:0 | 1.14 ± 0.06     | 1.08 ± 0.05 | -0.051 | 0.387        | 0.553        | 1.15 ± 0.06 | 1.09 ± 0.05 | -0.058 | 0.268   | 0.966 |
| PC 16:0/18:1 | 1.23 ± 0.05     | 1.16 ± 0.05 | -0.075 | 0.117        | 0.330        | 1.21 ± 0.07 | 1.21 ± 0.06 | 0.002  | 0.981   | 0.997 |
| PC 16:0/18:2 | 1.00 ± 0.03     | 0.98 ± 0.03 | -0.021 | 0.570        | 0.712        | 1.00 ± 0.04 | 1.03 ± 0.04 | 0.026  | 0.587   | 0.966 |
| PC 16:0/19:1 | 2.26 ± 0.16     | 2.20 ± 0.12 | -0.063 | 0.456        | 0.618        | 2.32 ± 0.16 | 2.22 ± 0.16 | -0.103 | 0.518   | 0.966 |
| PC 16:0/20:4 | 1.37 ± 0.06     | 1.28 ± 0.05 | -0.093 | 0.180        | 0.354        | 1.37 ± 0.05 | 1.42 ± 0.07 | 0.053  | 0.405   | 0.966 |
| PC 16:0/20:5 | 3.75 ± 0.36     | 6.47 ± 0.54 | 2.719  | <b>0.000</b> | <b>0.000</b> | 4.18 ± 0.53 | 3.23 ± 0.28 | -0.950 | 0.054   | 0.935 |
| PC 16:0/22:6 | 3.52 ± 0.16     | 3.95 ± 0.11 | 0.434  | <b>0.019</b> | 0.116        | 3.53 ± 0.15 | 3.68 ± 0.15 | 0.148  | 0.346   | 0.966 |
| PC 16:1/18:2 | 2.45 ± 0.31     | 2.08 ± 0.26 | -0.369 | 0.244        | 0.406        | 2.43 ± 0.23 | 2.62 ± 0.37 | 0.197  | 0.620   | 0.966 |
| PC 17:0/18:1 | 2.36 ± 0.26     | 2.13 ± 0.18 | -0.228 | 0.151        | 0.343        | 2.32 ± 0.28 | 2.13 ± 0.22 | -0.197 | 0.384   | 0.966 |
| PC 17:0/18:2 | 1.65 ± 0.11     | 1.61 ± 0.10 | -0.033 | 0.651        | 0.736        | 1.73 ± 0.10 | 1.71 ± 0.10 | -0.020 | 0.774   | 0.966 |
| PC 17:0/20:3 | 1.78 ± 0.20     | 1.67 ± 0.14 | -0.110 | 0.318        | 0.479        | 1.89 ± 0.19 | 1.91 ± 0.19 | 0.015  | 0.879   | 0.966 |
| PC 17:0/20:4 | 2.50 ± 0.28     | 1.99 ± 0.16 | -0.507 | <b>0.024</b> | 0.139        | 2.35 ± 0.22 | 2.49 ± 0.22 | 0.140  | 0.345   | 0.966 |
| PC 17:0/20:4 | 1.77 ± 0.25     | 2.29 ± 0.23 | 0.521  | 0.156        | 0.343        | 2.09 ± 0.24 | 2.21 ± 0.28 | 0.116  | 0.579   | 0.966 |
| PC 17:1/18:1 | 2.00 ± 0.22     | 1.91 ± 0.18 | -0.087 | 0.549        | 0.702        | 1.98 ± 0.20 | 1.90 ± 0.20 | -0.080 | 0.538   | 0.966 |
| PC 17:1/18:2 | 2.59 ± 0.23     | 2.51 ± 0.16 | -0.082 | 0.656        | 0.736        | 2.68 ± 0.19 | 2.65 ± 0.22 | -0.029 | 0.879   | 0.966 |
| PC 18:0/18:1 | 1.63 ± 0.08     | 1.56 ± 0.07 | -0.069 | 0.273        | 0.429        | 1.68 ± 0.09 | 1.62 ± 0.08 | -0.055 | 0.601   | 0.966 |
| PC 18:0/18:2 | 1.19 ± 0.04     | 1.19 ± 0.04 | 0.005  | 0.895        | 0.929        | 1.22 ± 0.04 | 1.22 ± 0.04 | 0.001  | 0.979   | 0.997 |
| PC 18:0/20:3 | 1.57 ± 0.08     | 1.46 ± 0.08 | -0.106 | 0.172        | 0.348        | 1.60 ± 0.09 | 1.63 ± 0.09 | 0.021  | 0.781   | 0.966 |
| PC 18:0/20:4 | 1.11 ± 0.07     | 1.11 ± 0.05 | 0.005  | 0.928        | 0.954        | 1.12 ± 0.05 | 1.22 ± 0.06 | 0.094  | 0.097   | 0.935 |

| Lipids         | $\omega$ 3 milk |                 |        |              |              | PhyS milk       |                 |        |              |       |
|----------------|-----------------|-----------------|--------|--------------|--------------|-----------------|-----------------|--------|--------------|-------|
|                | Before          | After           | Change | p-value      | FDR          | Before          | After           | Change | p-value      | FDR   |
| PC 18:0/22:4   | 1.87 $\pm$ 0.14 | 1.45 $\pm$ 0.13 | -0.417 | <b>0.000</b> | <b>0.000</b> | 1.89 $\pm$ 0.17 | 1.88 $\pm$ 0.19 | -0.012 | 0.941        | 0.995 |
| PC 18:0/22:5   | 1.10 $\pm$ 0.05 | 1.40 $\pm$ 0.05 | 0.299  | <b>0.000</b> | <b>0.000</b> | 1.18 $\pm$ 0.06 | 1.19 $\pm$ 0.06 | 0.013  | 0.846        | 0.966 |
| PC 18:0/22:6   | 3.48 $\pm$ 0.16 | 4.28 $\pm$ 0.16 | 0.797  | <b>0.000</b> | <b>0.000</b> | 3.60 $\pm$ 0.19 | 3.77 $\pm$ 0.15 | 0.172  | 0.298        | 0.966 |
| PC 18:1e/20:3  | 2.62 $\pm$ 0.35 | 2.49 $\pm$ 0.27 | -0.133 | 0.629        | 0.726        | 2.72 $\pm$ 0.26 | 2.57 $\pm$ 0.21 | -0.152 | 0.406        | 0.966 |
| PC 18:2/18:2   | 1.83 $\pm$ 0.15 | 1.62 $\pm$ 0.13 | -0.211 | 0.172        | 0.348        | 2.02 $\pm$ 0.17 | 1.86 $\pm$ 0.14 | -0.158 | 0.168        | 0.935 |
| PC 18:3/18:3   | 6.54 $\pm$ 0.60 | 8.30 $\pm$ 0.77 | 1.759  | <b>0.004</b> | <b>0.040</b> | 6.59 $\pm$ 0.47 | 6.38 $\pm$ 0.56 | -0.208 | 0.732        | 0.966 |
| PC 19:1/18:2   | 2.26 $\pm$ 0.25 | 1.81 $\pm$ 0.16 | -0.450 | <b>0.012</b> | 0.094        | 2.08 $\pm$ 0.21 | 1.99 $\pm$ 0.20 | -0.092 | 0.539        | 0.966 |
| PC 20:0/18:2   | 2.09 $\pm$ 0.15 | 2.02 $\pm$ 0.13 | -0.064 | 0.559        | 0.707        | 2.17 $\pm$ 0.12 | 2.00 $\pm$ 0.15 | -0.167 | 0.169        | 0.935 |
| PC 20:0/20:4   | 2.01 $\pm$ 0.09 | 2.09 $\pm$ 0.10 | 0.077  | 0.461        | 0.618        | 2.04 $\pm$ 0.08 | 2.15 $\pm$ 0.11 | 0.108  | 0.313        | 0.966 |
| PC 20:3/20:4   | 4.15 $\pm$ 0.32 | 3.42 $\pm$ 0.26 | -0.729 | <b>0.027</b> | 0.149        | 4.50 $\pm$ 0.43 | 4.06 $\pm$ 0.40 | -0.441 | 0.152        | 0.935 |
| PC 30:0        | 1.32 $\pm$ 0.16 | 1.08 $\pm$ 0.12 | -0.242 | 0.167        | 0.348        | 1.20 $\pm$ 0.18 | 1.09 $\pm$ 0.12 | -0.111 | 0.599        | 0.966 |
| PC 31:0        | 1.14 $\pm$ 0.10 | 1.17 $\pm$ 0.11 | 0.028  | 0.580        | 0.717        | 1.15 $\pm$ 0.13 | 1.13 $\pm$ 0.13 | -0.021 | 0.843        | 0.966 |
| PC 32:1        | 1.42 $\pm$ 0.12 | 1.20 $\pm$ 0.10 | -0.220 | <b>0.033</b> | 0.151        | 1.37 $\pm$ 0.15 | 1.31 $\pm$ 0.11 | -0.058 | 0.719        | 0.966 |
| PC 33:1        | 2.12 $\pm$ 0.14 | 1.90 $\pm$ 0.12 | -0.224 | <b>0.018</b> | 0.116        | 2.14 $\pm$ 0.22 | 2.05 $\pm$ 0.19 | -0.089 | 0.708        | 0.966 |
| PC 34:3        | 1.27 $\pm$ 0.13 | 1.04 $\pm$ 0.15 | -0.230 | 0.174        | 0.348        | 1.23 $\pm$ 0.13 | 1.14 $\pm$ 0.13 | -0.087 | 0.621        | 0.966 |
| PC 36:3        | 1.35 $\pm$ 0.05 | 1.24 $\pm$ 0.06 | -0.116 | 0.066        | 0.234        | 1.35 $\pm$ 0.06 | 1.35 $\pm$ 0.05 | 0.002  | 0.967        | 0.997 |
| PC 37:2        | 2.79 $\pm$ 0.45 | 2.23 $\pm$ 0.19 | -0.554 | 0.203        | 0.354        | 2.47 $\pm$ 0.24 | 2.33 $\pm$ 0.24 | -0.148 | 0.577        | 0.966 |
| PC 37:2        | 2.73 $\pm$ 0.26 | 2.79 $\pm$ 0.27 | 0.065  | 0.723        | 0.783        | 2.97 $\pm$ 0.25 | 2.77 $\pm$ 0.25 | -0.196 | 0.158        | 0.935 |
| PC 37:5        | 2.83 $\pm$ 0.22 | 3.32 $\pm$ 0.20 | 0.494  | <b>0.006</b> | <b>0.055</b> | 2.94 $\pm$ 0.22 | 2.68 $\pm$ 0.17 | -0.254 | 0.239        | 0.966 |
| PC 38:5        | 1.75 $\pm$ 0.07 | 1.74 $\pm$ 0.06 | -0.012 | 0.874        | 0.916        | 1.76 $\pm$ 0.06 | 1.76 $\pm$ 0.06 | 0.000  | 0.997        | 0.997 |
| PC 38:5        | 2.35 $\pm$ 0.12 | 3.73 $\pm$ 0.30 | 1.386  | <b>0.000</b> | <b>0.000</b> | 2.58 $\pm$ 0.22 | 2.32 $\pm$ 0.15 | -0.257 | 0.130        | 0.935 |
| PC 40:0        | 1.28 $\pm$ 0.07 | 1.27 $\pm$ 0.07 | -0.002 | 0.987        | 0.987        | 1.30 $\pm$ 0.04 | 1.28 $\pm$ 0.04 | -0.014 | 0.807        | 0.966 |
| PC 40:5        | 1.71 $\pm$ 0.12 | 1.39 $\pm$ 0.10 | -0.313 | <b>0.001</b> | <b>0.014</b> | 1.68 $\pm$ 0.13 | 1.69 $\pm$ 0.14 | 0.012  | 0.896        | 0.966 |
| PC 40:8        | 6.81 $\pm$ 0.44 | 7.62 $\pm$ 0.52 | 0.810  | 0.159        | 0.343        | 7.90 $\pm$ 0.62 | 6.70 $\pm$ 0.47 | -1.204 | <b>0.021</b> | 0.935 |
| PC O-16:0/14:0 | 1.09 $\pm$ 0.10 | 1.07 $\pm$ 0.12 | -0.020 | 0.754        | 0.805        | 1.14 $\pm$ 0.13 | 1.11 $\pm$ 0.13 | -0.029 | 0.723        | 0.966 |
| PC O-16:0/16:0 | 1.47 $\pm$ 0.13 | 1.41 $\pm$ 0.13 | -0.060 | 0.364        | 0.534        | 1.48 $\pm$ 0.13 | 1.50 $\pm$ 0.15 | 0.020  | 0.749        | 0.966 |
| PC O-16:0/18:2 | 3.00 $\pm$ 0.29 | 2.81 $\pm$ 0.37 | -0.182 | 0.432        | 0.594        | 3.61 $\pm$ 0.39 | 3.15 $\pm$ 0.44 | -0.464 | 0.153        | 0.935 |
| PC O-16:0/20:3 | 2.07 $\pm$ 0.21 | 1.88 $\pm$ 0.20 | -0.187 | 0.364        | 0.534        | 2.23 $\pm$ 0.20 | 1.80 $\pm$ 0.11 | -0.426 | <b>0.017</b> | 0.935 |
| PC O-16:0/20:4 | 2.50 $\pm$ 0.16 | 2.21 $\pm$ 0.16 | -0.291 | 0.063        | 0.234        | 2.59 $\pm$ 0.15 | 2.39 $\pm$ 0.13 | -0.207 | 0.124        | 0.935 |
| PC O-16:0/22:4 | 2.36 $\pm$ 0.21 | 1.92 $\pm$ 0.17 | -0.432 | <b>0.004</b> | <b>0.040</b> | 2.27 $\pm$ 0.16 | 2.18 $\pm$ 0.18 | -0.090 | 0.302        | 0.966 |

| Lipids         | $\omega$ 3 milk |             |        |                 |              | PhyS milk   |             |        |                 |       |
|----------------|-----------------|-------------|--------|-----------------|--------------|-------------|-------------|--------|-----------------|-------|
|                | Before          | After       | Change | <i>p</i> -value | FDR          | Before      | After       | Change | <i>p</i> -value | FDR   |
| PC O-18:0/18:2 | 1.71 ± 0.19     | 1.58 ± 0.25 | -0.125 | 0.305           | 0.466        | 1.92 ± 0.22 | 1.85 ± 0.31 | -0.069 | 0.751           | 0.966 |
| PC O-18:0/20:4 | 2.31 ± 0.17     | 2.04 ± 0.17 | -0.273 | <b>0.031</b>    | 0.151        | 2.33 ± 0.15 | 2.28 ± 0.17 | -0.047 | 0.614           | 0.966 |
| PC O-18:0/22:4 | 2.09 ± 0.25     | 1.63 ± 0.20 | -0.463 | <b>0.003</b>    | <b>0.037</b> | 2.05 ± 0.20 | 1.94 ± 0.19 | -0.118 | 0.308           | 0.966 |
| PC O-18:1/18:1 | 4.17 ± 0.34     | 3.99 ± 0.28 | -0.171 | 0.540           | 0.699        | 4.14 ± 0.33 | 4.10 ± 0.33 | -0.038 | 0.847           | 0.966 |
| PC O-18:1/18:2 | 2.99 ± 0.22     | 2.71 ± 0.21 | -0.287 | 0.115           | 0.330        | 3.30 ± 0.25 | 2.98 ± 0.29 | -0.326 | 0.104           | 0.935 |
| PC O-18:1/22:4 | 4.01 ± 0.34     | 3.57 ± 0.28 | -0.436 | 0.103           | 0.312        | 3.96 ± 0.25 | 3.83 ± 0.29 | -0.135 | 0.520           | 0.966 |
| PC O-18:2/20:4 | 5.01 ± 0.67     | 6.18 ± 0.52 | 1.169  | 0.089           | 0.288        | 5.22 ± 0.55 | 4.94 ± 0.43 | -0.281 | 0.447           | 0.966 |
| PC O-20:0/20:4 | 2.74 ± 0.23     | 2.50 ± 0.21 | -0.235 | 0.133           | 0.340        | 2.72 ± 0.18 | 2.70 ± 0.20 | -0.013 | 0.893           | 0.966 |
| PC O-22:0/20:4 | 3.36 ± 0.28     | 3.18 ± 0.27 | -0.180 | 0.412           | 0.578        | 3.39 ± 0.21 | 3.30 ± 0.23 | -0.081 | 0.523           | 0.966 |
| PC O-22:1/20:4 | 4.01 ± 0.35     | 3.72 ± 0.30 | -0.291 | 0.245           | 0.406        | 4.08 ± 0.27 | 4.07 ± 0.28 | -0.013 | 0.951           | 0.996 |
| PC O-24:1/20:4 | 4.78 ± 0.46     | 4.53 ± 0.36 | -0.243 | 0.469           | 0.622        | 4.80 ± 0.31 | 4.89 ± 0.36 | 0.085  | 0.693           | 0.966 |
| PC O-34:0      | 1.39 ± 0.14     | 1.27 ± 0.13 | -0.126 | 0.105           | 0.312        | 1.41 ± 0.12 | 1.40 ± 0.16 | -0.009 | 0.931           | 0.994 |
| PC O-38:4      | 2.98 ± 0.21     | 2.65 ± 0.17 | -0.337 | 0.066           | 0.234        | 3.09 ± 0.18 | 2.82 ± 0.17 | -0.270 | 0.077           | 0.935 |
| PC O-38:5      | 2.80 ± 0.14     | 2.60 ± 0.14 | -0.204 | 0.188           | 0.354        | 2.88 ± 0.13 | 2.71 ± 0.12 | -0.162 | 0.191           | 0.966 |
| PC O-40:5      | 3.07 ± 0.24     | 2.98 ± 0.21 | -0.089 | 0.607           | 0.726        | 3.10 ± 0.18 | 3.05 ± 0.18 | -0.045 | 0.776           | 0.966 |
| PC O-42:6      | 2.92 ± 0.28     | 3.01 ± 0.33 | 0.090  | 0.625           | 0.726        | 3.02 ± 0.27 | 3.08 ± 0.29 | 0.055  | 0.704           | 0.966 |
| PC P-16:0/14:0 | 1.36 ± 0.12     | 1.32 ± 0.15 | -0.042 | 0.604           | 0.726        | 1.42 ± 0.16 | 1.32 ± 0.14 | -0.094 | 0.281           | 0.966 |
| PC P-16:0/16:0 | 1.55 ± 0.15     | 1.58 ± 0.13 | 0.030  | 0.678           | 0.753        | 1.60 ± 0.16 | 1.57 ± 0.16 | -0.030 | 0.718           | 0.966 |
| PC P-16:0/18:1 | 1.98 ± 0.18     | 1.85 ± 0.13 | -0.133 | 0.251           | 0.406        | 1.94 ± 0.16 | 1.92 ± 0.16 | -0.013 | 0.837           | 0.966 |
| PC P-16:0/18:2 | 1.40 ± 0.10     | 1.37 ± 0.12 | -0.037 | 0.627           | 0.726        | 1.45 ± 0.13 | 1.47 ± 0.13 | 0.023  | 0.695           | 0.966 |
| PC P-16:0/20:3 | 2.91 ± 0.41     | 2.56 ± 0.25 | -0.354 | 0.262           | 0.418        | 2.74 ± 0.25 | 2.67 ± 0.25 | -0.075 | 0.637           | 0.966 |
| PC P-16:0/20:4 | 2.08 ± 0.16     | 2.03 ± 0.16 | -0.052 | 0.726           | 0.783        | 2.06 ± 0.13 | 2.10 ± 0.15 | 0.034  | 0.737           | 0.966 |
| PC P-16:0/22:6 | 6.83 ± 0.76     | 8.43 ± 0.66 | 1.600  | <b>0.016</b>    | 0.116        | 6.79 ± 0.53 | 6.58 ± 0.56 | -0.209 | 0.520           | 0.966 |
| PC P-17:0/20:4 | 2.12 ± 0.24     | 2.08 ± 0.21 | -0.040 | 0.861           | 0.911        | 2.17 ± 0.16 | 2.10 ± 0.16 | -0.067 | 0.522           | 0.966 |
| PC P-18:0/20:4 | 2.20 ± 0.21     | 1.90 ± 0.24 | -0.303 | 0.092           | 0.289        | 2.17 ± 0.20 | 2.15 ± 0.19 | -0.024 | 0.831           | 0.966 |
| PC P-18:0/20:4 | 2.19 ± 0.22     | 2.11 ± 0.21 | -0.079 | 0.689           | 0.758        | 2.17 ± 0.17 | 2.19 ± 0.20 | 0.021  | 0.883           | 0.966 |
| PC P-36:2      | 2.14 ± 0.21     | 2.06 ± 0.20 | -0.077 | 0.634           | 0.726        | 2.20 ± 0.20 | 2.16 ± 0.20 | -0.042 | 0.712           | 0.966 |
| PE 16:0/18:1   | 0.99 ± 0.08     | 0.83 ± 0.08 | -0.167 | <b>0.045</b>    | 0.198        | 0.90 ± 0.07 | 0.88 ± 0.08 | -0.025 | 0.778           | 0.966 |
| PE 16:0/18:2   | 1.06 ± 0.09     | 0.82 ± 0.07 | -0.246 | <b>0.001</b>    | <b>0.014</b> | 1.00 ± 0.12 | 0.93 ± 0.11 | -0.078 | 0.255           | 0.966 |
| PE 16:0/20:4   | 1.19 ± 0.10     | 0.95 ± 0.09 | -0.231 | <b>0.018</b>    | 0.116        | 1.02 ± 0.09 | 1.10 ± 0.11 | 0.080  | 0.312           | 0.966 |

| Lipids                          | $\omega$ 3 milk |             |        |                 |              | PhyS milk   |             |        |                 |       |
|---------------------------------|-----------------|-------------|--------|-----------------|--------------|-------------|-------------|--------|-----------------|-------|
|                                 | Before          | After       | Change | <i>p</i> -value | FDR          | Before      | After       | Change | <i>p</i> -value | FDR   |
| PE 16:0/22:6                    | 3.82 ± 0.42     | 4.28 ± 0.49 | 0.466  | 0.186           | 0.354        | 3.38 ± 0.34 | 3.34 ± 0.37 | -0.042 | 0.842           | 0.966 |
| PE 18:0/18:1                    | 1.12 ± 0.15     | 0.88 ± 0.11 | -0.247 | 0.158           | 0.343        | 1.15 ± 0.15 | 1.10 ± 0.18 | -0.052 | 0.795           | 0.966 |
| PE 18:0/20:4                    | 1.41 ± 0.13     | 1.15 ± 0.11 | -0.262 | <b>0.033</b>    | 0.151        | 1.26 ± 0.11 | 1.34 ± 0.14 | 0.080  | 0.305           | 0.966 |
| PE 18:1e/22:6                   | 5.57 ± 1.01     | 6.72 ± 0.90 | 1.149  | 0.068           | 0.234        | 5.50 ± 0.84 | 4.86 ± 0.51 | -0.645 | 0.321           | 0.966 |
| PE 20:5/16:0                    | 1.85 ± 0.27     | 3.25 ± 0.41 | 1.404  | <b>0.001</b>    | <b>0.014</b> | 2.01 ± 0.31 | 1.54 ± 0.20 | -0.467 | 0.053           | 0.935 |
| PE P-16:0/18:2                  | 1.80 ± 0.20     | 1.55 ± 0.19 | -0.250 | 0.068           | 0.234        | 1.99 ± 0.28 | 1.60 ± 0.18 | -0.383 | <b>0.040</b>    | 0.935 |
| PE P-16:0/20:4                  | 3.88 ± 0.56     | 3.11 ± 0.32 | -0.769 | 0.128           | 0.335        | 3.84 ± 0.53 | 3.28 ± 0.29 | -0.556 | 0.170           | 0.935 |
| PE P-16:0/22:6                  | 7.26 ± 1.01     | 8.17 ± 0.83 | 0.912  | 0.148           | 0.343        | 6.91 ± 0.69 | 6.43 ± 0.50 | -0.474 | 0.384           | 0.966 |
| PE P-18:0/18:1                  | 2.02 ± 0.25     | 1.87 ± 0.23 | -0.146 | 0.415           | 0.578        | 2.07 ± 0.21 | 1.76 ± 0.16 | -0.308 | <b>0.046</b>    | 0.935 |
| PE P-18:0/20:4                  | 3.73 ± 0.49     | 3.14 ± 0.39 | -0.591 | 0.150           | 0.343        | 3.89 ± 0.46 | 3.51 ± 0.37 | -0.380 | 0.237           | 0.966 |
| PE P-18:0/22:5 + PE P-20:1/20:4 | 3.28 ± 0.61     | 3.30 ± 0.55 | 0.013  | 0.977           | 0.986        | 3.21 ± 0.46 | 2.76 ± 0.30 | -0.444 | 0.312           | 0.966 |
| PE P-18:1/20:4                  | 4.83 ± 0.56     | 3.96 ± 0.37 | -0.873 | 0.078           | 0.260        | 4.86 ± 0.51 | 4.23 ± 0.33 | -0.632 | 0.112           | 0.935 |
| PE P-20:0/18:2                  | 1.22 ± 0.14     | 1.15 ± 0.13 | -0.075 | 0.480           | 0.629        | 1.21 ± 0.14 | 1.16 ± 0.11 | -0.054 | 0.562           | 0.966 |
| PE P-20:0/20:4                  | 2.00 ± 0.28     | 1.68 ± 0.22 | -0.316 | 0.150           | 0.343        | 1.92 ± 0.24 | 1.79 ± 0.15 | -0.121 | 0.509           | 0.966 |
| PI 16:0/18:1                    | 2.86 ± 0.33     | 2.51 ± 0.25 | -0.354 | 0.201           | 0.354        | 2.85 ± 0.33 | 2.35 ± 0.24 | -0.493 | 0.088           | 0.935 |
| PI 16:0/18:2                    | 1.75 ± 0.23     | 1.5 ± 0.22  | -0.254 | 0.199           | 0.354        | 1.67 ± 0.25 | 1.58 ± 0.19 | -0.091 | 0.659           | 0.966 |
| PI 16:0/20:4                    | 2.18 ± 0.18     | 1.81 ± 0.18 | -0.375 | <b>0.031</b>    | 0.151        | 2.18 ± 0.22 | 2.00 ± 0.16 | -0.185 | 0.263           | 0.966 |
| PI 18:0/18:1                    | 2.60 ± 0.32     | 2.11 ± 0.27 | -0.491 | 0.202           | 0.354        | 2.55 ± 0.29 | 2.06 ± 0.21 | -0.498 | 0.100           | 0.935 |
| PI 18:0/18:2                    | 1.21 ± 0.16     | 1.2 ± 0.18  | -0.010 | 0.957           | 0.975        | 1.30 ± 0.16 | 1.22 ± 0.13 | -0.081 | 0.533           | 0.966 |
| PI 18:0/20:3                    | 2.26 ± 0.24     | 1.93 ± 0.22 | -0.336 | 0.201           | 0.354        | 2.07 ± 0.22 | 1.99 ± 0.21 | -0.075 | 0.546           | 0.966 |
| PI 18:0/20:4                    | 3.08 ± 0.27     | 2.70 ± 0.28 | -0.383 | 0.249           | 0.406        | 3.06 ± 0.24 | 2.87 ± 0.24 | -0.196 | 0.360           | 0.966 |
| PI 18:0/22:6                    | 4.01 ± 0.41     | 4.34 ± 0.35 | 0.329  | 0.377           | 0.546        | 3.85 ± 0.37 | 3.69 ± 0.29 | -0.158 | 0.565           | 0.966 |

Data are given as mean ± SEM. Values before and after the 4-week interventions were analyzed by paired Student's *t*-test. *n* = 20. *p* < 0.05 indicates significance.

**Table S2.** HDL glycerolipid levels at baseline and after intervention with omega-3 or milk supplemented with phytosterols.

| Lipids   | $\omega 3$ milk |             |        |                 |       | PhyS milk   |             |        |                 |       |
|----------|-----------------|-------------|--------|-----------------|-------|-------------|-------------|--------|-----------------|-------|
|          | Before          | After       | Change | <i>p</i> -value | FDR   | Before      | After       | Change | <i>p</i> -value | FDR   |
| TAG 40:0 | 0.13 ± 0.02     | 0.13 ± 0.02 | 0.004  | 0.834           | 0.924 | 0.10 ± 0.01 | 0.16 ± 0.04 | 0.064  | 0.143           | 0.999 |
| TAG 42:0 | 0.15 ± 0.03     | 0.17 ± 0.03 | 0.020  | 0.647           | 0.827 | 0.12 ± 0.01 | 0.16 ± 0.03 | 0.047  | 0.248           | 0.999 |
| TAG 42:1 | 0.18 ± 0.05     | 0.23 ± 0.05 | 0.053  | 0.478           | 0.656 | 0.14 ± 0.02 | 0.19 ± 0.04 | 0.054  | 0.287           | 0.999 |
| TAG 43:1 | 0.37 ± 0.15     | 0.60 ± 0.13 | 0.234  | 0.287           | 0.518 | 0.34 ± 0.05 | 0.36 ± 0.09 | 0.027  | 0.814           | 0.999 |
| TAG 44:0 | 0.23 ± 0.05     | 0.31 ± 0.06 | 0.082  | 0.357           | 0.557 | 0.21 ± 0.02 | 0.22 ± 0.04 | 0.014  | 0.793           | 0.999 |
| TAG 44:1 | 0.31 ± 0.08     | 0.40 ± 0.08 | 0.086  | 0.498           | 0.674 | 0.24 ± 0.03 | 0.29 ± 0.06 | 0.050  | 0.504           | 0.999 |
| TAG 44:2 | 0.25 ± 0.08     | 0.35 ± 0.07 | 0.100  | 0.369           | 0.566 | 0.21 ± 0.03 | 0.25 ± 0.05 | 0.037  | 0.560           | 0.999 |
| TAG 45:0 | 0.34 ± 0.12     | 0.57 ± 0.11 | 0.228  | 0.195           | 0.515 | 0.35 ± 0.04 | 0.36 ± 0.08 | 0.012  | 0.906           | 0.999 |
| TAG 45:1 | 0.38 ± 0.14     | 0.65 ± 0.14 | 0.271  | 0.211           | 0.515 | 0.36 ± 0.05 | 0.39 ± 0.09 | 0.022  | 0.850           | 0.999 |
| TAG 45:2 | 0.36 ± 0.15     | 0.61 ± 0.15 | 0.249  | 0.269           | 0.515 | 0.32 ± 0.04 | 0.38 ± 0.10 | 0.051  | 0.671           | 0.999 |
| TAG 46:0 | 0.25 ± 0.06     | 0.32 ± 0.07 | 0.063  | 0.609           | 0.800 | 0.23 ± 0.03 | 0.24 ± 0.04 | 0.008  | 0.889           | 0.999 |
| TAG 46:1 | 0.31 ± 0.07     | 0.32 ± 0.05 | 0.007  | 0.941           | 0.988 | 0.24 ± 0.03 | 0.26 ± 0.04 | 0.029  | 0.618           | 0.999 |
| TAG 46:2 | 0.25 ± 0.06     | 0.32 ± 0.06 | 0.071  | 0.447           | 0.623 | 0.20 ± 0.02 | 0.24 ± 0.05 | 0.037  | 0.485           | 0.999 |
| TAG 46:3 | 0.27 ± 0.07     | 0.37 ± 0.07 | 0.101  | 0.324           | 0.541 | 0.23 ± 0.02 | 0.28 ± 0.06 | 0.047  | 0.469           | 0.999 |
| TAG 46:3 | 0.27 ± 0.07     | 0.36 ± 0.07 | 0.097  | 0.332           | 0.541 | 0.23 ± 0.03 | 0.27 ± 0.06 | 0.042  | 0.509           | 0.999 |
| TAG 47:0 | 0.46 ± 0.14     | 0.68 ± 0.13 | 0.229  | 0.249           | 0.515 | 0.45 ± 0.05 | 0.46 ± 0.10 | 0.006  | 0.963           | 0.999 |
| TAG 47:1 | 0.34 ± 0.11     | 0.55 ± 0.11 | 0.203  | 0.241           | 0.515 | 0.33 ± 0.04 | 0.36 ± 0.08 | 0.027  | 0.787           | 0.999 |
| TAG 48:0 | 0.20 ± 0.04     | 0.21 ± 0.03 | 0.010  | 0.845           | 0.925 | 0.19 ± 0.03 | 0.19 ± 0.02 | 0.000  | 0.996           | 0.999 |
| TAG 48:1 | 0.32 ± 0.06     | 0.29 ± 0.04 | -0.028 | 0.686           | 0.841 | 0.26 ± 0.05 | 0.25 ± 0.03 | -0.007 | 0.906           | 0.999 |
| TAG 48:2 | 0.35 ± 0.06     | 0.33 ± 0.04 | -0.018 | 0.792           | 0.910 | 0.30 ± 0.04 | 0.31 ± 0.04 | 0.007  | 0.897           | 0.999 |
| TAG 48:3 | 0.30 ± 0.05     | 0.33 ± 0.05 | 0.023  | 0.707           | 0.845 | 0.27 ± 0.03 | 0.31 ± 0.05 | 0.043  | 0.421           | 0.999 |
| TAG 49:1 | 0.35 ± 0.06     | 0.43 ± 0.06 | 0.078  | 0.413           | 0.585 | 0.31 ± 0.03 | 0.32 ± 0.05 | 0.007  | 0.911           | 0.999 |
| TAG 49:2 | 0.31 ± 0.07     | 0.41 ± 0.07 | 0.105  | 0.295           | 0.522 | 0.29 ± 0.02 | 0.30 ± 0.05 | 0.017  | 0.784           | 0.999 |
| TAG 49:3 | 0.39 ± 0.10     | 0.56 ± 0.09 | 0.168  | 0.247           | 0.515 | 0.37 ± 0.03 | 0.39 ± 0.07 | 0.021  | 0.796           | 0.999 |
| TAG 50:0 | 0.23 ± 0.04     | 0.22 ± 0.02 | -0.007 | 0.870           | 0.942 | 0.21 ± 0.03 | 0.20 ± 0.02 | -0.005 | 0.907           | 0.999 |
| TAG 50:1 | 0.44 ± 0.05     | 0.36 ± 0.04 | -0.078 | 0.101           | 0.515 | 0.38 ± 0.05 | 0.37 ± 0.03 | -0.015 | 0.782           | 0.999 |
| TAG 50:2 | 0.45 ± 0.04     | 0.39 ± 0.04 | -0.066 | 0.116           | 0.515 | 0.41 ± 0.05 | 0.39 ± 0.03 | -0.015 | 0.775           | 0.999 |
| TAG 50:3 | 0.39 ± 0.03     | 0.36 ± 0.03 | -0.032 | 0.335           | 0.541 | 0.37 ± 0.04 | 0.37 ± 0.04 | -0.006 | 0.855           | 0.999 |

| Lipids   | $\omega 3$ milk |             |        |                 |       | PhyS milk   |             |        |                 |       |
|----------|-----------------|-------------|--------|-----------------|-------|-------------|-------------|--------|-----------------|-------|
|          | Before          | After       | Change | <i>p</i> -value | FDR   | Before      | After       | Change | <i>p</i> -value | FDR   |
| TAG 50:4 | 0.32 ± 0.04     | 0.29 ± 0.04 | -0.033 | 0.407           | 0.585 | 0.33 ± 0.04 | 0.33 ± 0.05 | 0.000  | 0.993           | 0.999 |
| TAG 51:1 | 0.34 ± 0.05     | 0.34 ± 0.04 | -0.001 | 0.992           | 0.992 | 0.29 ± 0.03 | 0.29 ± 0.04 | 0.000  | 0.999           | 0.999 |
| TAG 51:2 | 0.48 ± 0.05     | 0.45 ± 0.04 | -0.028 | 0.556           | 0.741 | 0.43 ± 0.04 | 0.42 ± 0.05 | -0.005 | 0.910           | 0.999 |
| TAG 51:3 | 0.49 ± 0.05     | 0.47 ± 0.05 | -0.022 | 0.642           | 0.827 | 0.45 ± 0.04 | 0.46 ± 0.06 | 0.003  | 0.931           | 0.999 |
| TAG 51:4 | 0.38 ± 0.04     | 0.40 ± 0.04 | 0.017  | 0.680           | 0.841 | 0.36 ± 0.03 | 0.38 ± 0.04 | 0.018  | 0.576           | 0.999 |
| TAG 52:0 | 0.25 ± 0.03     | 0.34 ± 0.05 | 0.092  | 0.157           | 0.515 | 0.23 ± 0.02 | 0.25 ± 0.03 | 0.015  | 0.720           | 0.999 |
| TAG 52:1 | 0.38 ± 0.05     | 0.31 ± 0.04 | -0.069 | 0.176           | 0.515 | 0.34 ± 0.05 | 0.33 ± 0.04 | -0.014 | 0.800           | 0.999 |
| TAG 52:2 | 0.67 ± 0.04     | 0.62 ± 0.04 | -0.058 | 0.076           | 0.515 | 0.64 ± 0.05 | 0.63 ± 0.03 | -0.006 | 0.849           | 0.999 |
| TAG 52:3 | 0.48 ± 0.03     | 0.43 ± 0.03 | -0.049 | 0.094           | 0.515 | 0.46 ± 0.04 | 0.45 ± 0.03 | -0.011 | 0.706           | 0.999 |
| TAG 52:4 | 0.35 ± 0.06     | 0.25 ± 0.06 | -0.099 | 0.139           | 0.515 | 0.36 ± 0.11 | 0.29 ± 0.05 | -0.064 | 0.574           | 0.999 |
| TAG 52:4 | 0.43 ± 0.04     | 0.39 ± 0.04 | -0.042 | 0.276           | 0.515 | 0.44 ± 0.04 | 0.41 ± 0.04 | -0.022 | 0.571           | 0.999 |
| TAG 52:5 | 0.40 ± 0.04     | 0.34 ± 0.04 | -0.055 | 0.236           | 0.515 | 0.44 ± 0.06 | 0.39 ± 0.05 | -0.050 | 0.431           | 0.999 |
| TAG 53:0 | 0.42 ± 0.10     | 0.63 ± 0.11 | 0.206  | 0.196           | 0.515 | 0.42 ± 0.04 | 0.42 ± 0.08 | -0.003 | 0.972           | 0.999 |
| TAG 53:1 | 0.33 ± 0.07     | 0.43 ± 0.06 | 0.104  | 0.280           | 0.515 | 0.30 ± 0.03 | 0.31 ± 0.05 | 0.009  | 0.889           | 0.999 |
| TAG 53:2 | 0.62 ± 0.06     | 0.56 ± 0.04 | -0.064 | 0.192           | 0.515 | 0.57 ± 0.05 | 0.55 ± 0.05 | -0.027 | 0.571           | 0.999 |
| TAG 53:4 | 0.51 ± 0.06     | 0.44 ± 0.05 | -0.067 | 0.253           | 0.515 | 0.51 ± 0.05 | 0.48 ± 0.06 | -0.032 | 0.533           | 0.999 |
| TAG 53:5 | 0.50 ± 0.07     | 0.40 ± 0.05 | -0.101 | 0.148           | 0.515 | 0.53 ± 0.09 | 0.45 ± 0.05 | -0.077 | 0.356           | 0.999 |
| TAG 54:0 | 0.31 ± 0.08     | 0.59 ± 0.13 | 0.278  | 0.089           | 0.515 | 0.32 ± 0.03 | 0.32 ± 0.06 | 0.005  | 0.950           | 0.999 |
| TAG 54:1 | 0.27 ± 0.07     | 0.61 ± 0.15 | 0.345  | 0.054           | 0.515 | 0.28 ± 0.04 | 0.31 ± 0.05 | 0.034  | 0.627           | 0.999 |
| TAG 54:2 | 0.53 ± 0.05     | 0.54 ± 0.04 | 0.003  | 0.959           | 0.988 | 0.53 ± 0.06 | 0.52 ± 0.06 | -0.005 | 0.888           | 0.999 |
| TAG 54:3 | 0.72 ± 0.05     | 0.64 ± 0.04 | -0.076 | 0.068           | 0.515 | 0.73 ± 0.07 | 0.71 ± 0.06 | -0.022 | 0.578           | 0.999 |
| TAG 54:4 | 0.58 ± 0.05     | 0.47 ± 0.03 | -0.109 | <b>0.031</b>    | 0.515 | 0.59 ± 0.06 | 0.57 ± 0.05 | -0.029 | 0.566           | 0.999 |
| TAG 54:5 | 0.46 ± 0.05     | 0.38 ± 0.03 | -0.087 | 0.129           | 0.515 | 0.51 ± 0.07 | 0.46 ± 0.05 | -0.046 | 0.566           | 0.999 |
| TAG 54:5 | 0.90 ± 0.07     | 0.71 ± 0.08 | -0.190 | <b>0.018</b>    | 0.414 | 0.85 ± 0.09 | 0.80 ± 0.07 | -0.046 | 0.541           | 0.999 |
| TAG 54:6 | 0.39 ± 0.07     | 0.28 ± 0.05 | -0.106 | 0.214           | 0.515 | 0.51 ± 0.14 | 0.39 ± 0.07 | -0.119 | 0.463           | 0.999 |
| TAG 54:6 | 0.74 ± 0.05     | 0.82 ± 0.09 | 0.076  | 0.378           | 0.570 | 0.74 ± 0.05 | 0.66 ± 0.06 | -0.082 | 0.171           | 0.999 |
| TAG 54:7 | 0.35 ± 0.12     | 0.18 ± 0.05 | -0.164 | 0.397           | 0.580 | 0.74 ± 0.39 | 0.25 ± 0.08 | -0.492 | 0.234           | 0.999 |
| TAG 55:1 | 0.34 ± 0.12     | 0.61 ± 0.13 | 0.264  | 0.178           | 0.515 | 0.34 ± 0.04 | 0.35 ± 0.09 | 0.010  | 0.924           | 0.999 |
| TAG 55:3 | 0.47 ± 0.05     | 0.47 ± 0.04 | -0.002 | 0.977           | 0.988 | 0.45 ± 0.04 | 0.41 ± 0.04 | -0.037 | 0.361           | 0.999 |
| TAG 56:0 | 0.35 ± 0.11     | 0.60 ± 0.12 | 0.245  | 0.174           | 0.515 | 0.36 ± 0.04 | 0.35 ± 0.08 | -0.011 | 0.916           | 0.999 |

| Lipids    | $\omega 3$ milk |                 |        |                 |       | PhyS milk       |                 |        |                 |       |
|-----------|-----------------|-----------------|--------|-----------------|-------|-----------------|-----------------|--------|-----------------|-------|
|           | Before          | After           | Change | <i>p</i> -value | FDR   | Before          | After           | Change | <i>p</i> -value | FDR   |
| TAG 56:1  | 0.30 $\pm$ 0.10 | 0.59 $\pm$ 0.14 | 0.292  | 0.122           | 0.515 | 0.29 $\pm$ 0.04 | 0.31 $\pm$ 0.07 | 0.022  | 0.810           | 0.999 |
| TAG 56:2  | 0.33 $\pm$ 0.06 | 0.46 $\pm$ 0.08 | 0.133  | 0.229           | 0.515 | 0.34 $\pm$ 0.05 | 0.35 $\pm$ 0.06 | 0.002  | 0.976           | 0.999 |
| TAG 56:3  | 0.46 $\pm$ 0.05 | 0.37 $\pm$ 0.03 | -0.096 | 0.116           | 0.515 | 0.47 $\pm$ 0.08 | 0.38 $\pm$ 0.06 | -0.093 | 0.081           | 0.999 |
| TAG 56:5  | 1.60 $\pm$ 0.16 | 1.41 $\pm$ 0.13 | -0.195 | 0.320           | 0.541 | 1.62 $\pm$ 0.18 | 1.43 $\pm$ 0.14 | -0.188 | 0.231           | 0.999 |
| TAG 56:6  | 1.11 $\pm$ 0.09 | 1.01 $\pm$ 0.09 | -0.104 | 0.303           | 0.526 | 1.09 $\pm$ 0.10 | 1.00 $\pm$ 0.09 | -0.095 | 0.204           | 0.999 |
| TAG 56:7  | 0.92 $\pm$ 0.08 | 0.91 $\pm$ 0.09 | -0.008 | 0.942           | 0.988 | 0.94 $\pm$ 0.09 | 0.87 $\pm$ 0.09 | -0.069 | 0.510           | 0.999 |
| TAG 56:7  | 4.47 $\pm$ 0.66 | 6.16 $\pm$ 0.81 | 1.687  | <b>0.002</b>    | 0.184 | 4.54 $\pm$ 0.68 | 3.31 $\pm$ 0.35 | -1.228 | 0.066           | 0.999 |
| TAG 56:8  | 0.52 $\pm$ 0.07 | 0.63 $\pm$ 0.10 | 0.103  | 0.384           | 0.570 | 0.58 $\pm$ 0.12 | 0.45 $\pm$ 0.08 | -0.126 | 0.429           | 0.999 |
| TAG 56:8  | 3.54 $\pm$ 0.49 | 4.66 $\pm$ 0.55 | 1.126  | <b>0.015</b>    | 0.414 | 3.83 $\pm$ 0.60 | 2.74 $\pm$ 0.29 | -1.085 | 0.094           | 0.999 |
| TAG 58:1  | 0.28 $\pm$ 0.10 | 0.50 $\pm$ 0.11 | 0.223  | 0.160           | 0.515 | 0.29 $\pm$ 0.04 | 0.29 $\pm$ 0.07 | 0.004  | 0.961           | 0.999 |
| TAG 58:10 | 1.60 $\pm$ 0.20 | 2.17 $\pm$ 0.29 | 0.576  | 0.075           | 0.515 | 2.04 $\pm$ 0.40 | 1.47 $\pm$ 0.20 | -0.575 | 0.235           | 0.999 |
| TAG 58:2  | 0.22 $\pm$ 0.06 | 0.37 $\pm$ 0.08 | 0.147  | 0.155           | 0.515 | 0.24 $\pm$ 0.03 | 0.24 $\pm$ 0.05 | 0.006  | 0.924           | 0.999 |
| TAG 58:3  | 0.23 $\pm$ 0.05 | 0.25 $\pm$ 0.04 | 0.017  | 0.811           | 0.910 | 0.25 $\pm$ 0.06 | 0.16 $\pm$ 0.03 | -0.085 | 0.180           | 0.999 |
| TAG 58:6  | 0.75 $\pm$ 0.08 | 0.72 $\pm$ 0.08 | -0.029 | 0.695           | 0.841 | 0.75 $\pm$ 0.09 | 0.61 $\pm$ 0.06 | -0.141 | 0.111           | 0.999 |
| TAG 58:8  | 2.73 $\pm$ 0.36 | 3.70 $\pm$ 0.46 | 0.968  | <b>0.012</b>    | 0.414 | 3.20 $\pm$ 0.61 | 2.12 $\pm$ 0.21 | -1.080 | 0.097           | 0.999 |
| TAG 58:9  | 2.91 $\pm$ 0.37 | 3.50 $\pm$ 0.35 | 0.587  | 0.114           | 0.515 | 3.48 $\pm$ 0.69 | 2.43 $\pm$ 0.26 | -1.056 | 0.169           | 0.999 |
| TAG 59:1  | 0.33 $\pm$ 0.12 | 0.53 $\pm$ 0.12 | 0.198  | 0.258           | 0.515 | 0.31 $\pm$ 0.04 | 0.32 $\pm$ 0.08 | 0.017  | 0.857           | 0.999 |
| TAG 60:1  | 0.30 $\pm$ 0.10 | 0.53 $\pm$ 0.11 | 0.230  | 0.191           | 0.515 | 0.31 $\pm$ 0.04 | 0.30 $\pm$ 0.07 | -0.014 | 0.881           | 0.999 |
| TAG 60:2  | 0.24 $\pm$ 0.07 | 0.39 $\pm$ 0.08 | 0.151  | 0.175           | 0.515 | 0.26 $\pm$ 0.03 | 0.24 $\pm$ 0.05 | -0.020 | 0.759           | 0.999 |
| TAG 60:3  | 0.22 $\pm$ 0.05 | 0.33 $\pm$ 0.06 | 0.107  | 0.236           | 0.515 | 0.22 $\pm$ 0.02 | 0.21 $\pm$ 0.04 | 0.000  | 0.993           | 0.999 |
| DAG 32:0  | 0.27 $\pm$ 0.02 | 0.30 $\pm$ 0.03 | 0.039  | 0.278           | 0.515 | 0.26 $\pm$ 0.02 | 0.27 $\pm$ 0.01 | 0.008  | 0.730           | 0.999 |
| DAG 32:1  | 0.25 $\pm$ 0.04 | 0.24 $\pm$ 0.03 | -0.009 | 0.810           | 0.910 | 0.21 $\pm$ 0.03 | 0.20 $\pm$ 0.03 | -0.009 | 0.814           | 0.999 |
| DAG 34:0  | 0.36 $\pm$ 0.03 | 0.46 $\pm$ 0.05 | 0.103  | 0.072           | 0.515 | 0.36 $\pm$ 0.01 | 0.37 $\pm$ 0.02 | 0.014  | 0.577           | 0.999 |
| DAG 34:1  | 0.47 $\pm$ 0.05 | 0.42 $\pm$ 0.06 | -0.052 | 0.274           | 0.515 | 0.44 $\pm$ 0.07 | 0.42 $\pm$ 0.05 | -0.025 | 0.662           | 0.999 |
| DAG 34:2  | 0.21 $\pm$ 0.03 | 0.19 $\pm$ 0.02 | -0.022 | 0.247           | 0.515 | 0.21 $\pm$ 0.03 | 0.19 $\pm$ 0.02 | -0.015 | 0.567           | 0.999 |
| DAG 36:1  | 0.75 $\pm$ 0.08 | 0.79 $\pm$ 0.09 | 0.037  | 0.686           | 0.841 | 0.73 $\pm$ 0.10 | 0.71 $\pm$ 0.09 | -0.018 | 0.842           | 0.999 |
| DAG 36:2  | 0.83 $\pm$ 0.08 | 0.75 $\pm$ 0.07 | -0.074 | 0.192           | 0.515 | 0.84 $\pm$ 0.11 | 0.80 $\pm$ 0.10 | -0.041 | 0.439           | 0.999 |
| DAG 36:3  | 0.20 $\pm$ 0.03 | 0.18 $\pm$ 0.02 | -0.020 | 0.275           | 0.515 | 0.20 $\pm$ 0.03 | 0.18 $\pm$ 0.03 | -0.015 | 0.631           | 0.999 |
| DAG 36:4  | 0.27 $\pm$ 0.03 | 0.23 $\pm$ 0.02 | -0.041 | 0.356           | 0.557 | 0.25 $\pm$ 0.03 | 0.24 $\pm$ 0.02 | -0.013 | 0.458           | 0.999 |
| DAG 36:4  | 0.25 $\pm$ 0.03 | 0.24 $\pm$ 0.04 | -0.009 | 0.965           | 0.988 | 0.26 $\pm$ 0.05 | 0.21 $\pm$ 0.02 | -0.054 | 0.241           | 0.999 |



| Lipids           | $\omega$ 3 milk |                 |        |                 |       | PhyS milk       |                 |        |                 |       |
|------------------|-----------------|-----------------|--------|-----------------|-------|-----------------|-----------------|--------|-----------------|-------|
|                  | Before          | After           | Change | <i>p</i> -value | FDR   | Before          | After           | Change | <i>p</i> -value | FDR   |
| DAG 38:4         | 0.35 $\pm$ 0.02 | 0.34 $\pm$ 0.02 | -0.009 | 0.727           | 0.857 | 0.35 $\pm$ 0.02 | 0.32 $\pm$ 0.02 | -0.027 | 0.285           | 0.999 |
| DAG 38:5         | 0.53 $\pm$ 0.04 | 0.47 $\pm$ 0.04 | -0.060 | 0.180           | 0.515 | 0.52 $\pm$ 0.05 | 0.47 $\pm$ 0.04 | -0.046 | 0.129           | 0.999 |
| MAG 16:0/0:0/0:0 | 0.29 $\pm$ 0.02 | 0.29 $\pm$ 0.01 | -0.006 | 0.769           | 0.896 | 0.30 $\pm$ 0.01 | 0.31 $\pm$ 0.01 | 0.013  | 0.148           | 0.999 |
| MAG 18:0/0:0/0:0 | 0.27 $\pm$ 0.01 | 0.27 $\pm$ 0.01 | 0.001  | 0.974           | 0.988 | 0.27 $\pm$ 0.00 | 0.28 $\pm$ 0.00 | 0.004  | 0.504           | 0.999 |

Data are given as mean  $\pm$  SEM. Values before and after the 4-week interventions were analyzed by paired Student's *t* -test. *n* = 20. *p* < 0.05 indicates significance.

**Table S3.** HDL sphingolipid levels at baseline and after intervention with omega-3 or milk supplemented with phytosterols.

| Lipids                        | $\omega$ 3 milk |                 |        |         |       | PhyS milk       |                 |        |         |       |
|-------------------------------|-----------------|-----------------|--------|---------|-------|-----------------|-----------------|--------|---------|-------|
|                               | Before          | After           | Change | p-value | FDR   | Before          | After           | Change | p-value | FDR   |
| SM 31:1                       | 0.89 $\pm$ 0.10 | 0.87 $\pm$ 0.11 | -0.026 | 0.717   | 0.981 | 0.93 $\pm$ 0.11 | 0.93 $\pm$ 0.10 | -0.002 | 0.982   | 0.984 |
| SM 32:1                       | 1.05 $\pm$ 0.08 | 1.04 $\pm$ 0.09 | -0.001 | 0.981   | 0.981 | 1.08 $\pm$ 0.10 | 1.11 $\pm$ 0.10 | 0.029  | 0.639   | 0.984 |
| SM 33:1                       | 1.11 $\pm$ 0.12 | 1.05 $\pm$ 0.11 | -0.064 | 0.294   | 0.981 | 1.12 $\pm$ 0.12 | 1.16 $\pm$ 0.13 | 0.038  | 0.551   | 0.984 |
| SM 36:2                       | 0.95 $\pm$ 0.07 | 0.94 $\pm$ 0.06 | -0.003 | 0.938   | 0.981 | 0.92 $\pm$ 0.06 | 0.97 $\pm$ 0.08 | 0.053  | 0.182   | 0.984 |
| SM 38:0                       | 0.93 $\pm$ 0.08 | 0.90 $\pm$ 0.08 | -0.032 | 0.567   | 0.981 | 0.87 $\pm$ 0.07 | 0.87 $\pm$ 0.07 | 0.003  | 0.955   | 0.984 |
| SM 38:1                       | 0.81 $\pm$ 0.04 | 0.85 $\pm$ 0.05 | 0.040  | 0.292   | 0.981 | 0.81 $\pm$ 0.04 | 0.85 $\pm$ 0.05 | 0.037  | 0.187   | 0.984 |
| SM 39:1                       | 1.28 $\pm$ 0.11 | 1.29 $\pm$ 0.11 | 0.014  | 0.822   | 0.981 | 1.30 $\pm$ 0.11 | 1.35 $\pm$ 0.12 | 0.050  | 0.405   | 0.984 |
| SM 42:1                       | 1.06 $\pm$ 0.08 | 1.06 $\pm$ 0.08 | -0.002 | 0.975   | 0.981 | 1.06 $\pm$ 0.06 | 1.05 $\pm$ 0.08 | -0.004 | 0.915   | 0.984 |
| SM 42:3                       | 1.37 $\pm$ 0.11 | 1.35 $\pm$ 0.09 | -0.020 | 0.781   | 0.981 | 1.34 $\pm$ 0.09 | 1.40 $\pm$ 0.11 | 0.056  | 0.341   | 0.984 |
| SM 43:1                       | 1.13 $\pm$ 0.15 | 1.06 $\pm$ 0.13 | -0.069 | 0.385   | 0.981 | 1.10 $\pm$ 0.12 | 1.12 $\pm$ 0.15 | 0.020  | 0.833   | 0.984 |
| SM 43:2                       | 1.75 $\pm$ 0.25 | 1.67 $\pm$ 0.18 | -0.079 | 0.593   | 0.981 | 1.61 $\pm$ 0.17 | 1.76 $\pm$ 0.23 | 0.150  | 0.389   | 0.984 |
| SM d16:1/24:1                 | 2.22 $\pm$ 0.18 | 2.28 $\pm$ 0.17 | 0.064  | 0.580   | 0.981 | 2.21 $\pm$ 0.19 | 2.32 $\pm$ 0.20 | 0.110  | 0.329   | 0.984 |
| SM d18:0/14:0                 | 0.84 $\pm$ 0.06 | 0.79 $\pm$ 0.07 | -0.051 | 0.367   | 0.981 | 0.82 $\pm$ 0.08 | 0.84 $\pm$ 0.08 | 0.014  | 0.794   | 0.984 |
| SM d18:0/15:0                 | 0.70 $\pm$ 0.07 | 0.69 $\pm$ 0.08 | -0.010 | 0.868   | 0.981 | 0.72 $\pm$ 0.08 | 0.72 $\pm$ 0.10 | 0.003  | 0.968   | 0.984 |
| SM d18:0/16:0                 | 0.78 $\pm$ 0.07 | 0.73 $\pm$ 0.06 | -0.052 | 0.325   | 0.981 | 0.77 $\pm$ 0.07 | 0.79 $\pm$ 0.08 | 0.019  | 0.611   | 0.984 |
| SM d18:0/18:0                 | 0.84 $\pm$ 0.08 | 0.78 $\pm$ 0.07 | -0.052 | 0.412   | 0.981 | 0.78 $\pm$ 0.08 | 0.80 $\pm$ 0.08 | 0.021  | 0.749   | 0.984 |
| SM d18:0/22:0                 | 0.87 $\pm$ 0.08 | 0.84 $\pm$ 0.08 | -0.030 | 0.691   | 0.981 | 0.81 $\pm$ 0.06 | 0.81 $\pm$ 0.07 | -0.004 | 0.931   | 0.984 |
| SM d18:1/12:0                 | 0.87 $\pm$ 0.08 | 0.85 $\pm$ 0.10 | -0.021 | 0.772   | 0.981 | 0.89 $\pm$ 0.12 | 0.89 $\pm$ 0.10 | -0.001 | 0.984   | 0.984 |
| SM d18:1/16:0                 | 0.89 $\pm$ 0.06 | 0.86 $\pm$ 0.05 | -0.024 | 0.558   | 0.981 | 0.90 $\pm$ 0.06 | 0.91 $\pm$ 0.06 | 0.016  | 0.641   | 0.984 |
| SM d18:1/17:0                 | 0.91 $\pm$ 0.09 | 0.93 $\pm$ 0.08 | 0.020  | 0.653   | 0.981 | 0.90 $\pm$ 0.08 | 0.95 $\pm$ 0.10 | 0.051  | 0.300   | 0.984 |
| SM d18:1/18:0                 | 0.64 $\pm$ 0.04 | 0.66 $\pm$ 0.04 | 0.015  | 0.598   | 0.981 | 0.64 $\pm$ 0.04 | 0.69 $\pm$ 0.05 | 0.047  | 0.102   | 0.984 |
| SM d18:1/22:0                 | 0.88 $\pm$ 0.04 | 0.88 $\pm$ 0.05 | -0.001 | 0.975   | 0.981 | 0.88 $\pm$ 0.04 | 0.90 $\pm$ 0.05 | 0.021  | 0.488   | 0.984 |
| SM d18:1/23:0                 | 1.33 $\pm$ 0.10 | 1.29 $\pm$ 0.09 | -0.040 | 0.593   | 0.981 | 1.32 $\pm$ 0.08 | 1.34 $\pm$ 0.10 | 0.017  | 0.750   | 0.984 |
| SM d18:1/23:1                 | 2.17 $\pm$ 0.24 | 2.10 $\pm$ 0.19 | -0.072 | 0.546   | 0.981 | 2.10 $\pm$ 0.19 | 2.21 $\pm$ 0.22 | 0.110  | 0.331   | 0.984 |
| SM d18:1/24:1 + SM d18:2/24:0 | 1.43 $\pm$ 0.09 | 1.44 $\pm$ 0.08 | 0.009  | 0.895   | 0.981 | 1.43 $\pm$ 0.08 | 1.43 $\pm$ 0.09 | 0.004  | 0.939   | 0.984 |
| SM d18:1/25:0                 | 1.47 $\pm$ 0.16 | 1.41 $\pm$ 0.13 | -0.059 | 0.535   | 0.981 | 1.45 $\pm$ 0.12 | 1.43 $\pm$ 0.16 | -0.023 | 0.787   | 0.984 |
| SM d18:2/14:0                 | 1.38 $\pm$ 0.14 | 1.27 $\pm$ 0.15 | -0.115 | 0.276   | 0.981 | 1.36 $\pm$ 0.14 | 1.37 $\pm$ 0.15 | 0.017  | 0.836   | 0.984 |
| SM d18:2/16:0                 | 1.40 $\pm$ 0.10 | 1.33 $\pm$ 0.10 | -0.072 | 0.400   | 0.981 | 1.41 $\pm$ 0.10 | 1.42 $\pm$ 0.12 | 0.008  | 0.895   | 0.984 |

| Lipids                        | $\omega$ 3 milk |                 |        |         |       | PhyS milk       |                 |        |         |       |
|-------------------------------|-----------------|-----------------|--------|---------|-------|-----------------|-----------------|--------|---------|-------|
|                               | Before          | After           | Change | p-value | FDR   | Before          | After           | Change | p-value | FDR   |
| SM d18:2/20:0                 | 0.99 $\pm$ 0.08 | 1.01 $\pm$ 0.07 | 0.024  | 0.583   | 0.981 | 0.97 $\pm$ 0.07 | 1.04 $\pm$ 0.09 | 0.065  | 0.149   | 0.984 |
| SM d18:2/22:0                 | 1.05 $\pm$ 0.07 | 1.05 $\pm$ 0.08 | 0.005  | 0.946   | 0.981 | 1.04 $\pm$ 0.07 | 1.09 $\pm$ 0.08 | 0.053  | 0.205   | 0.984 |
| SM d18:2/23:0                 | 1.78 $\pm$ 0.17 | 1.73 $\pm$ 0.16 | -0.046 | 0.665   | 0.981 | 1.77 $\pm$ 0.15 | 1.82 $\pm$ 0.17 | 0.049  | 0.498   | 0.984 |
| Cer 40:2                      | 0.95 $\pm$ 0.09 | 0.95 $\pm$ 0.09 | 0.004  | 0.964   | 0.981 | 0.99 $\pm$ 0.11 | 0.93 $\pm$ 0.10 | -0.058 | 0.514   | 0.984 |
| Cer 42:3                      | 1.06 $\pm$ 0.10 | 1.04 $\pm$ 0.09 | -0.024 | 0.830   | 0.981 | 1.10 $\pm$ 0.10 | 1.03 $\pm$ 0.11 | -0.074 | 0.351   | 0.984 |
| Cer d18:1/16:0                | 0.52 $\pm$ 0.03 | 0.57 $\pm$ 0.04 | 0.052  | 0.135   | 0.981 | 0.54 $\pm$ 0.04 | 0.52 $\pm$ 0.04 | -0.015 | 0.431   | 0.984 |
| Cer d18:1/18:0                | 0.92 $\pm$ 0.06 | 0.90 $\pm$ 0.05 | -0.025 | 0.693   | 0.981 | 0.94 $\pm$ 0.08 | 0.94 $\pm$ 0.08 | -0.004 | 0.932   | 0.984 |
| Cer d18:1/20:0                | 0.96 $\pm$ 0.08 | 0.92 $\pm$ 0.07 | -0.044 | 0.497   | 0.981 | 0.97 $\pm$ 0.08 | 0.90 $\pm$ 0.09 | -0.070 | 0.295   | 0.984 |
| Cer d18:1/21:0                | 1.00 $\pm$ 0.09 | 0.96 $\pm$ 0.10 | -0.035 | 0.550   | 0.981 | 1.03 $\pm$ 0.10 | 0.95 $\pm$ 0.09 | -0.080 | 0.332   | 0.984 |
| Cer d18:1/22:0                | 0.61 $\pm$ 0.05 | 0.56 $\pm$ 0.04 | -0.048 | 0.381   | 0.981 | 0.63 $\pm$ 0.05 | 0.58 $\pm$ 0.06 | -0.053 | 0.270   | 0.984 |
| Cer d18:1/23:0                | 0.40 $\pm$ 0.03 | 0.37 $\pm$ 0.03 | -0.026 | 0.423   | 0.981 | 0.42 $\pm$ 0.04 | 0.39 $\pm$ 0.04 | -0.030 | 0.374   | 0.984 |
| Cer d18:1/24:0                | 0.45 $\pm$ 0.04 | 0.41 $\pm$ 0.03 | -0.043 | 0.351   | 0.981 | 0.45 $\pm$ 0.04 | 0.42 $\pm$ 0.04 | -0.035 | 0.331   | 0.984 |
| Cer d18:1/24:1+Cer d18:2/24:0 | 1.03 $\pm$ 0.09 | 0.95 $\pm$ 0.07 | -0.076 | 0.356   | 0.981 | 1.02 $\pm$ 0.08 | 0.98 $\pm$ 0.10 | -0.042 | 0.533   | 0.984 |
| Cer d18:1/25:0                | 0.53 $\pm$ 0.05 | 0.53 $\pm$ 0.04 | 0.004  | 0.938   | 0.981 | 0.54 $\pm$ 0.06 | 0.51 $\pm$ 0.06 | -0.032 | 0.597   | 0.984 |
| Cer d43:1                     | 0.41 $\pm$ 0.05 | 0.35 $\pm$ 0.03 | -0.061 | 0.086   | 0.981 | 0.39 $\pm$ 0.04 | 0.37 $\pm$ 0.04 | -0.020 | 0.594   | 0.984 |
| MHC d18:1/16:0                | 0.66 $\pm$ 0.05 | 0.74 $\pm$ 0.06 | 0.075  | 0.100   | 0.981 | 0.69 $\pm$ 0.05 | 0.70 $\pm$ 0.04 | 0.009  | 0.804   | 0.984 |
| MHC d18:1/22:0                | 1.36 $\pm$ 0.14 | 1.45 $\pm$ 0.14 | 0.090  | 0.445   | 0.981 | 1.42 $\pm$ 0.11 | 1.43 $\pm$ 0.17 | 0.013  | 0.899   | 0.984 |
| MHC d18:1/23:0                | 1.42 $\pm$ 0.12 | 1.44 $\pm$ 0.14 | 0.015  | 0.865   | 0.981 | 1.50 $\pm$ 0.13 | 1.47 $\pm$ 0.18 | -0.028 | 0.808   | 0.984 |
| MHC d18:1/24:0                | 1.12 $\pm$ 0.11 | 1.16 $\pm$ 0.12 | 0.047  | 0.548   | 0.981 | 1.19 $\pm$ 0.10 | 1.14 $\pm$ 0.13 | -0.048 | 0.522   | 0.984 |

Data are given as mean  $\pm$  SEM. Values before and after the 4-week interventions were analyzed by paired Student's t -test. n = 20.  $p < 0.05$  indicates significance.

**Table S4.** HDL- cholesteryl ester levels at baseline and after intervention with omega-3 or milk supplemented with phytosterols.

| Lipids  | $\omega$ 3 milk |             |        |                 |              | PhyS milk   |             |        |                 |              |
|---------|-----------------|-------------|--------|-----------------|--------------|-------------|-------------|--------|-----------------|--------------|
|         | Before          | After       | Change | <i>p</i> -value | FDR          | Before      | After       | Change | <i>p</i> -value | FDR          |
| CE 16:0 | 1.08 ± 0.05     | 1.11 ± 0.05 | 0.025  | 0.519           | 0.727        | 1.10 ± 0.05 | 1.09 ± 0.05 | -0.007 | 0.815           | 0.891        |
| CE 16:1 | 1.07 ± 0.12     | 0.90 ± 0.07 | -0.170 | 0.087           | 0.203        | 1.08 ± 0.12 | 1.00 ± 0.11 | -0.082 | 0.472           | 0.891        |
| CE 17:0 | 1.42 ± 0.20     | 1.41 ± 0.14 | -0.006 | 0.960           | 0.960        | 1.45 ± 0.18 | 1.42 ± 0.16 | -0.030 | 0.800           | 0.891        |
| CE 17:1 | 1.58 ± 0.19     | 1.48 ± 0.12 | -0.098 | 0.513           | 0.727        | 1.61 ± 0.20 | 1.45 ± 0.14 | -0.155 | 0.346           | 0.807        |
| CE 18:0 | 1.05 ± 0.08     | 1.08 ± 0.07 | 0.024  | 0.637           | 0.811        | 1.10 ± 0.07 | 0.98 ± 0.06 | -0.114 | 0.080           | 0.373        |
| CE 18:1 | 1.45 ± 0.08     | 1.45 ± 0.06 | -0.005 | 0.936           | 0.960        | 1.45 ± 0.07 | 1.44 ± 0.08 | -0.010 | 0.864           | 0.891        |
| CE 18:2 | 1.02 ± 0.05     | 1.08 ± 0.05 | 0.055  | 0.109           | 0.218        | 1.05 ± 0.06 | 1.07 ± 0.06 | 0.019  | 0.552           | 0.891        |
| CE 18:3 | 1.78 ± 0.20     | 1.61 ± 0.16 | -0.173 | 0.068           | 0.190        | 1.84 ± 0.19 | 1.78 ± 0.17 | -0.058 | 0.712           | 0.891        |
| CE 20:2 | 1.66 ± 0.26     | 2.19 ± 0.31 | 0.525  | <b>0.008</b>    | <b>0.037</b> | 1.92 ± 0.31 | 3.30 ± 0.54 | 1.385  | <b>0.001</b>    | <b>0.014</b> |
| CE 20:3 | 2.24 ± 0.29     | 2.06 ± 0.13 | -0.184 | 0.421           | 0.727        | 2.19 ± 0.16 | 2.21 ± 0.15 | 0.018  | 0.837           | 0.891        |
| CE 20:4 | 1.50 ± 0.10     | 1.47 ± 0.07 | -0.028 | 0.747           | 0.872        | 1.51 ± 0.06 | 1.56 ± 0.08 | 0.056  | 0.241           | 0.675        |
| CE 20:5 | 3.92 ± 0.48     | 7.08 ± 0.50 | 3.164  | <b>0.000</b>    | <b>0.000</b> | 4.23 ± 0.48 | 3.65 ± 0.32 | -0.578 | 0.175           | 0.612        |
| CE 22:4 | 2.14 ± 0.21     | 1.89 ± 0.15 | -0.254 | 0.061           | 0.190        | 2.08 ± 0.13 | 2.37 ± 0.18 | 0.295  | <b>0.014</b>    | 0.098        |
| CE 22:6 | 5.31 ± 0.51     | 6.51 ± 0.32 | 1.195  | <b>0.006</b>    | <b>0.037</b> | 5.35 ± 0.36 | 5.31 ± 0.36 | -0.043 | 0.891           | 0.891        |

Data are given as mean ± SEM. Values before and after the 4-week interventions were analyzed by paired Student's *t* -test. *n* = 20. *p* < 0.05 indicates significance.

**Table S5.** Differences in several ratios after dietary intervention with  $\omega$ 3- or PhyS- supplemented milk.

| Ratios                          | $\omega$ 3 milk |                  |                 |             | PhyS milk        |                 |                 |             |
|---------------------------------|-----------------|------------------|-----------------|-------------|------------------|-----------------|-----------------|-------------|
|                                 | Before          | After            | <i>p</i> -value | Fold change | Before           | After           | <i>p</i> -value | Fold change |
| PC(16:0/18:1) / PE(16:0/18:1)   | 1.44 $\pm$ 0.18 | 1.62 $\pm$ 0.15  | 0.13            | 1.21        | 1.50 $\pm$ 0.14  | 1.67 $\pm$ 0.21 | 0.26            | 1.13        |
| PC(16:0/18:2) / PE(16:0/18:2)   | 1.14 $\pm$ 0.15 | 1.42 $\pm$ 0.16  | <b>0.03</b>     | 1.33        | 1.22 $\pm$ 0.13  | 1.34 $\pm$ 0.14 | 0.19            | 1.16        |
| PC(16:0/20:4) / PE(16:0/20:4)   | 1.42 $\pm$ 0.24 | 1.72 $\pm$ 0.26  | <b>0.03</b>     | 1.23        | 1.57 $\pm$ 0.18  | 1.70 $\pm$ 0.30 | 0.39            | 1.03        |
| PC(16:0/22:6) / PE(16:0/22:6)   | 1.24 $\pm$ 0.25 | 1.26 $\pm$ 0.19  | 0.88            | 1.08        | 1.38 $\pm$ 0.24  | 1.52 $\pm$ 0.28 | 0.08            | 1.09        |
| PC(16:1e/18:2) / PE(16:1e/18:2) | 0.88 $\pm$ 0.07 | 1.01 $\pm$ 0.08  | 0.11            | 1.19        | 0.85 $\pm$ 0.06  | 1.01 $\pm$ 0.08 | <b>0.01</b>     | 1.26        |
| PC(16:1e/20:4) / PE(16:1e/20:4) | 0.62 $\pm$ 0.05 | 0.74 $\pm$ 0.06  | 0.07            | 1.27        | 0.62 $\pm$ 0.04  | 0.68 $\pm$ 0.04 | 0.22            | 1.16        |
| PC(16:1e/22:6) / PE(16:1e/22:6) | 1.01 $\pm$ 0.07 | 1.13 $\pm$ 0.09  | <b>0.03</b>     | 1.11        | 1.04 $\pm$ 0.07  | 1.06 $\pm$ 0.07 | 0.74            | 1.06        |
| PC(18:0/20:4) / PE(18:0/20:4)   | 0.93 $\pm$ 0.14 | 1.21 $\pm$ 0.17  | <b>0.00</b>     | 1.31        | 1.03 $\pm$ 0.12  | 1.09 $\pm$ 0.13 | 0.39            | 1.06        |
| PC(18:1e/18:1) / PE(18:1e/18:1) | 2.35 $\pm$ 0.20 | 2.62 $\pm$ 0.26  | 0.37            | 1.21        | 2.17 $\pm$ 0.17  | 2.63 $\pm$ 0.31 | 0.13            | 1.25        |
| PC(18:2e/20:4) / PE(18:2e/20:4) | 1.10 $\pm$ 0.09 | 1.73 $\pm$ 0.15  | <b>0.00</b>     | 1.69        | 1.19 $\pm$ 0.12  | 1.23 $\pm$ 0.09 | 0.73            | 1.18        |
| PC-DHA / PC                     | 0.13 $\pm$ 0.00 | 0.16 $\pm$ 0.00  | <b>0.00</b>     | 1.23        | 0.14 $\pm$ 0.00  | 0.14 $\pm$ 0.00 | 0.87            | 1.01        |
| SM / PC                         | 0.16 $\pm$ 0.01 | 0.16 $\pm$ 0.01  | 0.35            | 0.99        | 0.16 $\pm$ 0.01  | 0.17 $\pm$ 0.01 | <b>0.00</b>     | 1.07        |
| SM + DAG / Cer + PC             | 0.18 $\pm$ 0.01 | 0.18 $\pm$ 0.00  | 0.19            | 0.98        | 0.17 $\pm$ 0.01  | 0.18 $\pm$ 0.01 | <b>0.01</b>     | 1.06        |
| TAG / DAG                       | 9.83 $\pm$ 0.58 | 12.15 $\pm$ 0.82 | <b>0.01</b>     | 1.28        | 11.14 $\pm$ 1.08 | 9.64 $\pm$ 0.72 | 0.23            | 0.98        |

Values are given as mean  $\pm$  SEM. Values before and after the 4-week interventions were analyzed by paired Student's *t*-test. *n* = 20. *p* < 0.05 indicates significance.

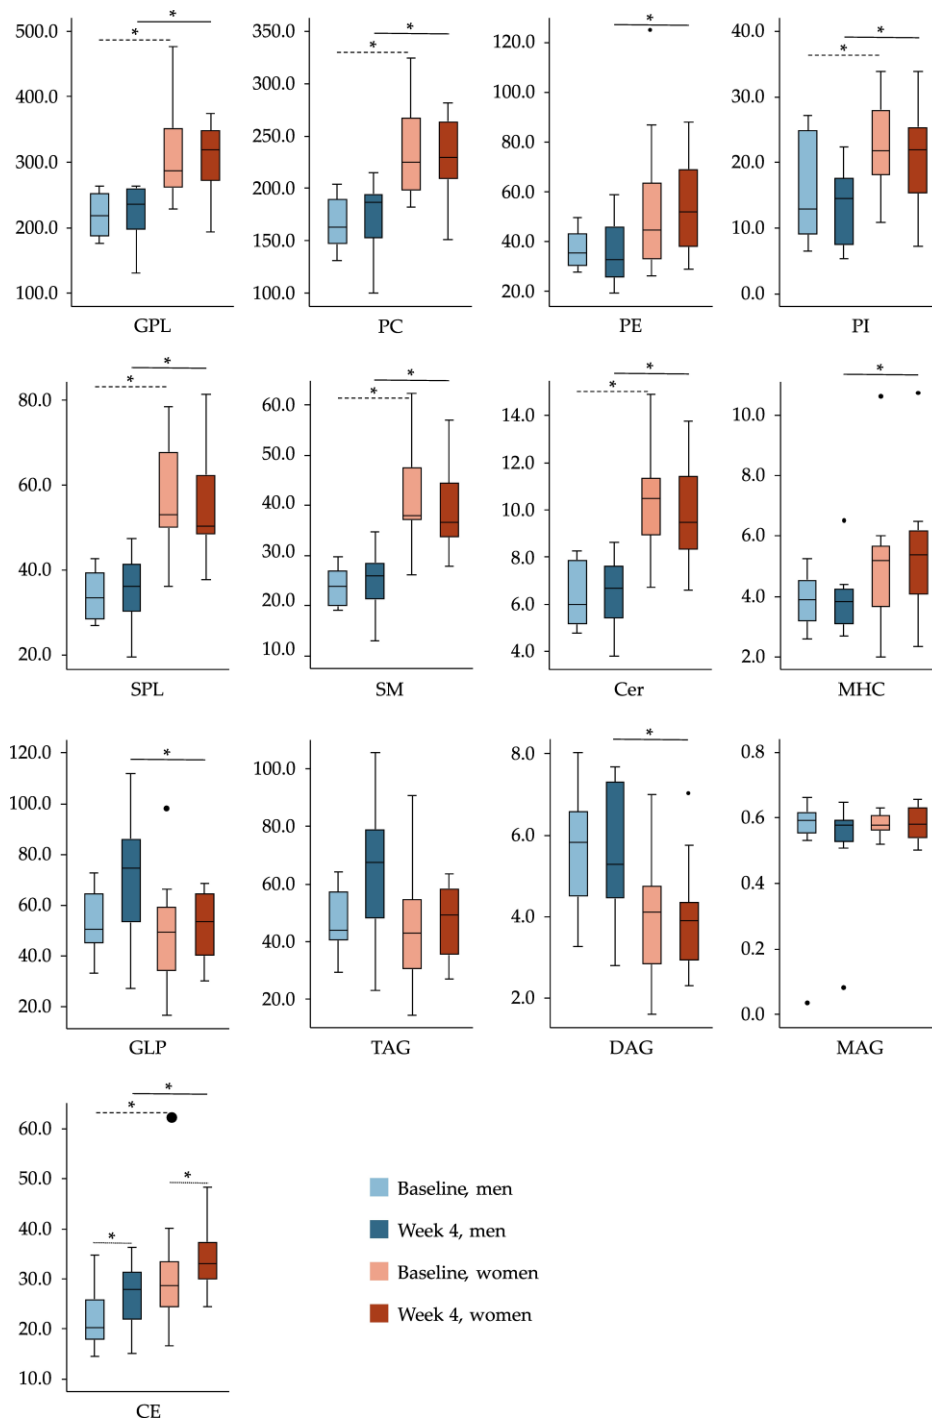

**Figure S1.** Sex-related differences in HDL composition at baseline and after four-week of  $\omega$ 3-milk intake. Values expressed as median [IQR]). Dashed lines signify comparison between sexes at baseline. Black line means comparison between sexes at the end of the intervention. Dotted line means comparison between sexes between the beginning and the end of the intervention. \*Indicates significance ( $p < 0.05$ ).  $n = 12$  (women) and  $n = 8$  (men). CE: Cholesteryl esters; Cer: Ceramides; DAG: Diacylglycerols; GLP: glycerolipids; GPL: glycerophospholipids; MAG: Monoacylglycerols; MHC: Monohexosylceramides; PE: Phosphatidylethanolamines; PI: Phosphatidylinositols; SM: Sphingomyelin; SPL: sphingolipids and TAG: Triacylglycerols.
